# Supplementary material for: Localization and Functional Characterization of a Novel Adipokinetic Hormone in the Mollusk, Aplysia californica
Source: PubMed Central journal article supplement (PMC4146582; doi:10.1371/journal.pone.0106014), 2014-08-27
Supplement: pone.0106014.s001.pdf [file pone.0106014.s001.pdf]

|                             | 1  | - | 2 | 3 | 4 | 5 | 6 | 7 | 8 | 9 | 10 |       |
|-----------------------------|----|---|---|---|---|---|---|---|---|---|----|-------|
| AKH Aplysia                 | pQ | - | I | H | F | S | P | D | W | G | T  | amide |
| AKH Limpet                  | pQ | - | I | H | F | S | P | T | W | G | S  | amide |
| AKH I Silkworm              | pQ | - | L | T | F | T | P | G | W | G | Q  | amide |
| AKH I Anopheles             | pQ | - | L | T | F | T | P | A | W | - | -  | amide |
| AKH Cockroach               | pQ | - | L | T | F | T | P | N | W | - | -  | amide |
| AKH I Yellow Fever Mosquito | pQ | - | L | T | F | T | P | S | W | - | -  | amide |
| AKH Planthopper             | pQ | - | V | N | F | S | P | N | W | - | -  | amide |
| AKH I Tsetse Fly            | pQ | - | L | T | F | S | P | G | W | - | -  | amide |
| Crz Western Honey Bee       | pQ | T | F | T | Y | S | H | G | W | T | N  | amide |
| Crz Giant Honey Bee         | pQ | M | F | T | Y | S | H | G | W | T | N  | amide |
| Crz Leafcutter Bee          | pQ | T | F | Q | Y | S | H | G | W | T | N  | amide |
| Crz Fruit Fly               | pQ | T | F | Q | Y | S | H | G | W | T | S  | amide |
| Crz Jonah Crab              | pQ | T | F | Q | Y | S | R | G | W | T | N  | amide |
| Crz Gladiator               | pQ | T | F | H | Y | S | Q | G | W | T | N  | amide |
